# Supplementary material for: A Metabolomic Approach to Clarifying the Effect of AST-120 on 5/6 Nephrectomized Rats by Capillary Electrophoresis with Mass Spectrometry (CE-MS)
Source: MDPI journal article supplement (doi:10.3390/toxins4111309), 2012-11-14
Supplement: s1 [file s1]

## Supplementary Information

**Table S1.** Plasma concentrations of all the anionic compounds detected in this experiment. The data were expressed as means  $\pm$  SD. S, Sham; C, Control; K, AST-120 (Kremezin®). P values from Tukey's test were shown for the compounds which were significant by ANOVA with Benjamini-Hochberg correction.

| Compound name                | Sham ( $\mu$ M) (n=3) | Control ( $\mu$ M) (n=13) | AST-120 ( $\mu$ M) (n=11) | P value (Tukey's multiple comparison procedure) |         |         |
|------------------------------|-----------------------|---------------------------|---------------------------|-------------------------------------------------|---------|---------|
|                              |                       |                           |                           | S vs C                                          | S vs K  | C vs K  |
| Butanoate                    | 20.00 $\pm$ 5.29      | 8.18 $\pm$ 2.21           | 7.33 $\pm$ 1.71           | <0.0001                                         | <0.0001 | 0.6783  |
| 4-Pyridoxate                 | 0.23 $\pm$ 0.08       | 0.87 $\pm$ 0.46           | 0.17 $\pm$ 0.07           | 0.0149                                          | 0.9571  | <0.0001 |
| o-Hydroxybenzoate            | 3.90 $\pm$ 2.46       | 7.60 $\pm$ 3.06           | 2.77 $\pm$ 1.00           | 0.0562                                          | 0.7474  | 0.0001  |
| 4-Oxopentanoate              | 2.53 $\pm$ 0.40       | 4.56 $\pm$ 0.76           | 3.20 $\pm$ 1.03           | 0.0034                                          | 0.4731  | 0.0021  |
| Allantoate                   | 4.47 $\pm$ 0.29       | 14.92 $\pm$ 3.55          | 12.08 $\pm$ 4.19          | 0.0005                                          | 0.0111  | 0.1661  |
| Citrate                      | 69.33 $\pm$ 24.01     | 238.46 $\pm$ 67.15        | 211.64 $\pm$ 52.60        | 0.0004                                          | 0.003   | 0.515   |
| cis-Aconitate                | 3.70 $\pm$ 1.31       | 11.97 $\pm$ 3.20          | 13.04 $\pm$ 3.66          | 0.0018                                          | 0.0006  | 0.712   |
| Malonate                     | 4.43 $\pm$ 1.21       | 6.70 $\pm$ 1.07           | 7.41 $\pm$ 0.99           | 0.0069                                          | 0.0006  | 0.2454  |
| Hippurate                    | 16.33 $\pm$ 5.03      | 41.46 $\pm$ 20.64         | 16.55 $\pm$ 5.53          | 0.0403                                          | 0.9997  | 0.0014  |
| Isocitrate                   | 3.27 $\pm$ 0.78       | 11.87 $\pm$ 3.32          | 10.44 $\pm$ 3.57          | 0.0012                                          | 0.0075  | 0.5474  |
| N-Acetylneuraminate          | 4.03 $\pm$ 0.40       | 5.78 $\pm$ 1.04           | 4.58 $\pm$ 0.90           | 0.0208                                          | 0.6503  | 0.0127  |
| N-Acetylaspartate            | 0.63 $\pm$ 0.29       | 2.36 $\pm$ 0.77           | 2.12 $\pm$ 0.73           | 0.003                                           | 0.012   | 0.6964  |
| Indoxyl sulfate              | 7.57 $\pm$ 4.50       | 25.18 $\pm$ 19.13         | 5.72 $\pm$ 4.75           | 0.1403                                          | 0.9774  | 0.0063  |
| Glutarate                    | 10.57 $\pm$ 1.69      | 26.77 $\pm$ 6.87          | 26.45 $\pm$ 9.38          | 0.0092                                          | 0.012   | 0.9946  |
| Saccharate                   | 0.78 $\pm$ 0.00       | 2.10 $\pm$ 0.74           | 2.39 $\pm$ 0.85           | 0.0303                                          | 0.0086  | 0.6204  |
| Isethionate                  | 2.63 $\pm$ 0.25       | 4.64 $\pm$ 1.82           | 6.53 $\pm$ 2.47           | 0.2979                                          | 0.0202  | 0.0839  |
| Homovanillate                | 2.10 $\pm$ 0.30       | 6.57 $\pm$ 2.65           | 5.70 $\pm$ 1.80           | 0.0112                                          | 0.0489  | 0.6069  |
| Glucuronate+Galacturonate    | 3.63 $\pm$ 0.85       | 14.28 $\pm$ 7.09          | 10.14 $\pm$ 4.17          |                                                 |         |         |
| 3-Phenylpropionate           | 7.17 $\pm$ 1.80       | 9.92 $\pm$ 2.26           | 11.25 $\pm$ 2.19          |                                                 |         |         |
| Cholate                      | 4.23 $\pm$ 3.44       | 10.10 $\pm$ 4.91          | 4.92 $\pm$ 4.99           |                                                 |         |         |
| 5-Oxoproline                 | 40.67 $\pm$ 7.64      | 53.38 $\pm$ 10.51         | 46.27 $\pm$ 5.20          |                                                 |         |         |
| Asp                          | 6.00 $\pm$ 0.35       | 12.35 $\pm$ 5.06          | 9.16 $\pm$ 3.12           |                                                 |         |         |
| Phenaceturate                | 1.30 $\pm$ 0.00       | 4.72 $\pm$ 4.32           | 1.64 $\pm$ 0.69           |                                                 |         |         |
| 2-Hydroxyisobutyrate         | 6.53 $\pm$ 1.55       | 14.92 $\pm$ 5.83          | 13.87 $\pm$ 4.18          |                                                 |         |         |
| Azelate                      | 0.87 $\pm$ 0.07       | 1.22 $\pm$ 0.33           | 0.97 $\pm$ 0.20           |                                                 |         |         |
| Pantothenate                 | 2.20 $\pm$ 0.20       | 3.54 $\pm$ 1.10           | 2.76 $\pm$ 0.83           |                                                 |         |         |
| 2-Hydroxy-4-methylpentanoate | 0.56 $\pm$ 0.00       | 2.84 $\pm$ 2.29           | 3.71 $\pm$ 1.94           |                                                 |         |         |
| Malate                       | 16.67 $\pm$ 5.86      | 29.92 $\pm$ 9.66          | 28.55 $\pm$ 8.72          |                                                 |         |         |
| N-Acetylglutamate            | 0.43 $\pm$ 0.00       | 0.75 $\pm$ 0.25           | 0.67 $\pm$ 0.21           |                                                 |         |         |
| Glucuronate                  | 8.40 $\pm$ 2.29       | 16.54 $\pm$ 5.01          | 16.85 $\pm$ 7.32          |                                                 |         |         |
| 2-Oxoisopentanoate           | 14.67 $\pm$ 1.53      | 10.05 $\pm$ 4.00          | 10.24 $\pm$ 2.41          |                                                 |         |         |
| Pimelate                     | 0.93 $\pm$ 0.04       | 1.78 $\pm$ 0.59           | 1.70 $\pm$ 0.64           |                                                 |         |         |
| Benzoate                     | 54.67 $\pm$ 19.66     | 38.85 $\pm$ 9.86          | 41.45 $\pm$ 11.99         |                                                 |         |         |
| Fumarate                     | 3.50 $\pm$ 1.05       | 6.02 $\pm$ 2.16           | 5.63 $\pm$ 1.75           |                                                 |         |         |
| 3-Hydroxybutyrate            | 242.00 $\pm$ 23.52    | 318.00 $\pm$ 116.97       | 250.00 $\pm$ 51.66        |                                                 |         |         |
| Threonate                    | 14.67 $\pm$ 1.15      | 13.31 $\pm$ 1.97          | 15.54 $\pm$ 3.58          |                                                 |         |         |
| 2-Hydroxybutyrate            | 8.13 $\pm$ 2.53       | 5.16 $\pm$ 1.18           | 6.98 $\pm$ 4.05           |                                                 |         |         |
| 3-Phenylactate               | 1.70 $\pm$ 0.00       | 5.05 $\pm$ 4.20           | 3.22 $\pm$ 1.37           |                                                 |         |         |
| 2-Hydroxypentanoate          | 18.67 $\pm$ 4.16      | 41.62 $\pm$ 22.44         | 43.36 $\pm$ 18.63         |                                                 |         |         |
| Glycerate                    | 29.33 $\pm$ 11.55     | 42.00 $\pm$ 12.75         | 37.91 $\pm$ 7.80          |                                                 |         |         |
| Hexanoate                    | 3.20 $\pm$ 0.53       | 3.05 $\pm$ 0.76           | 2.66 $\pm$ 0.46           |                                                 |         |         |
| Ru5P                         | 1.20 $\pm$ 0.00       | 2.40 $\pm$ 1.78           | 1.66 $\pm$ 0.83           |                                                 |         |         |
| Glycerophosphate             | 1.60 $\pm$ 0.00       | 2.35 $\pm$ 0.69           | 2.69 $\pm$ 1.38           |                                                 |         |         |
| 3-Methylbutanoate            | 5.67 $\pm$ 0.98       | 5.38 $\pm$ 0.44           | 5.21 $\pm$ 0.22           |                                                 |         |         |
| Adipate                      | 1.13 $\pm$ 0.15       | 1.54 $\pm$ 0.47           | 1.49 $\pm$ 0.41           |                                                 |         |         |
| Laurate                      | 5.37 $\pm$ 0.81       | 6.44 $\pm$ 1.43           | 5.97 $\pm$ 1.23           |                                                 |         |         |
| Succinate                    | 16.33 $\pm$ 4.51      | 18.85 $\pm$ 4.95          | 19.64 $\pm$ 3.64          |                                                 |         |         |
| Pelargonate                  | 2.93 $\pm$ 0.21       | 3.29 $\pm$ 0.58           | 3.14 $\pm$ 0.51           |                                                 |         |         |
| Cysteine S-sulfate           | 2.07 $\pm$ 0.25       | 3.16 $\pm$ 2.25           | 2.49 $\pm$ 1.44           |                                                 |         |         |
| 4-Methyl-2-oxopentanoate     | 34.00 $\pm$ 6.08      | 25.69 $\pm$ 16.12         | 25.45 $\pm$ 7.05          |                                                 |         |         |
| 2-Oxoglutarate               | 26.33 $\pm$ 8.14      | 35.92 $\pm$ 19.68         | 31.91 $\pm$ 8.90          |                                                 |         |         |
| Glycolate                    | 28.00 $\pm$ 1.73      | 27.54 $\pm$ 2.54          | 25.82 $\pm$ 6.65          |                                                 |         |         |
| Octanoate                    | 1.83 $\pm$ 0.51       | 2.05 $\pm$ 0.52           | 1.90 $\pm$ 0.31           |                                                 |         |         |
| Citraconate                  | 0.22 $\pm$ 0.00       | 0.26 $\pm$ 0.10           | 0.33 $\pm$ 0.30           |                                                 |         |         |
| Sebacate                     | 0.23 $\pm$ 0.05       | 0.26 $\pm$ 0.07           | 0.26 $\pm$ 0.05           |                                                 |         |         |
| trans-Aconitate              | 2.86 $\pm$ 2.98       | 2.59 $\pm$ 1.34           | 3.06 $\pm$ 1.23           |                                                 |         |         |
| 4-Acetylbutyrate             | 0.90 $\pm$ 0.87       | 1.26 $\pm$ 0.82           | 1.27 $\pm$ 0.70           |                                                 |         |         |
| Lactate                      | 2632.33 $\pm$ 639.88  | 2864.15 $\pm$ 1463.17     | 2526.82 $\pm$ 535.87      |                                                 |         |         |
| Citramalate                  | 0.62 $\pm$ 0.28       | 0.59 $\pm$ 0.25           | 0.67 $\pm$ 0.33           |                                                 |         |         |
| Propionate                   | 14.33 $\pm$ 10.10     | 13.73 $\pm$ 5.34          | 12.80 $\pm$ 5.67          |                                                 |         |         |
| Pyruvate                     | 99.00 $\pm$ 26.15     | 107.54 $\pm$ 67.44        | 103.27 $\pm$ 30.30        |                                                 |         |         |

**Table S2.** Plasma concentrations of all the cationic compounds detected in this experiment. The data were expressed as means  $\pm$  SD. S, Sham; C, Control; K, AST-120 (Kremezin®). P values from Tukey's test were shown for the compounds which were significant by ANOVA with Benjamini-Hochberg correction.

| Compound name                             | Sham ( $\mu$ M) (n=3) |         | Control ( $\mu$ M) (n=13) |          | AST-120 ( $\mu$ M) (n=11) |          | P value (Tukey's multiple comparison procedure) |        |        |
|-------------------------------------------|-----------------------|---------|---------------------------|----------|---------------------------|----------|-------------------------------------------------|--------|--------|
|                                           | Mean                  | SD      | Mean                      | SD       | Mean                      | SD       | S vs C                                          | S vs K | C vs K |
| Gly                                       | 202.33                | ± 23.63 | 317.08                    | ± 50.97  | 248.73                    | ± 27.08  | 0.0005                                          | 0.2068 | 0.0011 |
| Allantoin                                 | 141.33                | ± 44.16 | 426.54                    | ± 101.43 | 316.55                    | ± 83.39  | 0.0001                                          | 0.0176 | 0.0179 |
| N,N-Dimethylglycine                       | 7.20                  | ± 0.17  | 16.54                     | ± 3.04   | 15.45                     | ± 3.08   | 0.0001                                          | 0.0007 | 0.6436 |
| Trp                                       | 94.00                 | ± 12.49 | 53.92                     | ± 11.87  | 74.91                     | ± 17.44  | 0.0007                                          | 0.1286 | 0.0047 |
| Cytosine                                  | 0.69                  | ± 0.09  | 2.17                      | ± 1.15   | 0.63                      | ± 0.22   | 0.0259                                          | 0.9927 | 0.0004 |
| gamma-Guanidinobutyrate                   | 0.90                  | ± 0.21  | 2.95                      | ± 1.02   | 1.75                      | ± 0.51   | 0.0015                                          | 0.2563 | 0.0033 |
| Trimethylamine N-oxide                    | 4.77                  | ± 1.37  | 12.11                     | ± 5.33   | 19.82                     | ± 7.05   | 0.1507                                          | 0.0019 | 0.0109 |
| 5-Methylcytosine                          | 0.23                  | ± 0.00  | 0.40                      | ± 0.15   | 0.23                      | ± 0.00   | 0.0373                                          | 1      | 0.0011 |
| Gln                                       | 478.33                | ± 57.50 | 536.08                    | ± 49.51  | 460.55                    | ± 29.34  | 0.1131                                          | 0.8034 | 0.0007 |
| Glycerophosphorylcholine                  | 13.33                 | ± 0.58  | 16.23                     | ± 2.49   | 11.96                     | ± 2.56   | 0.1697                                          | 0.6649 | 0.0007 |
| Hydroxyproline                            | 31.33                 | ± 2.89  | 49.23                     | ± 6.13   | 45.27                     | ± 7.28   | 0.0006                                          | 0.0078 | 0.3092 |
| N-gamma-Ethylglutamine                    | 2.93                  | ± 0.50  | 5.33                      | ± 1.19   | 4.20                      | ± 0.79   | 0.0026                                          | 0.1443 | 0.0271 |
| 1-Methylnicotinamide                      | 0.45                  | ± 0.08  | 0.42                      | ± 0.24   | 0.15                      | ± 0.02   | 0.9691                                          | 0.036  | 0.0022 |
| Creatine                                  | 163.00                | ± 47.15 | 142.00                    | ± 46.51  | 90.09                     | ± 15.69  | 0.6541                                          | 0.0156 | 0.0061 |
| Homoarginine ; N6,N6,N6-Trimethyllysine   | 1.20                  | ± 0.10  | 2.64                      | ± 0.58   | 3.03                      | ± 0.91   | 0.012                                           | 0.0018 | 0.3955 |
| Citrulline                                | 57.67                 | ± 18.15 | 176.15                    | ± 40.80  | 169.55                    | ± 59.99  | 0.0024                                          | 0.0046 | 0.9412 |
| Nicotinamide                              | 1.35                  | ± 0.53  | 1.53                      | ± 0.37   | 0.99                      | ± 0.25   | 0.6886                                          | 0.2646 | 0.0022 |
| SDMA                                      | 0.46                  | ± 0.08  | 0.80                      | ± 0.12   | 0.82                      | ± 0.19   | 0.004                                           | 0.003  | 0.9565 |
| ADMA                                      | 0.18                  | ± 0.01  | 0.44                      | ± 0.07   | 0.45                      | ± 0.16   | 0.005                                           | 0.0042 | 0.978  |
| Anthranilate                              | 0.17                  | ± 0.00  | 4.15                      | ± 3.54   | 0.50                      | ± 1.09   | 0.0627                                          | 0.9793 | 0.0061 |
| Ala                                       | 331.00                | ± 43.31 | 499.54                    | ± 75.89  | 462.45                    | ± 70.42  | 0.0032                                          | 0.0245 | 0.4268 |
| gamma-Butyrobetaine                       | 2.03                  | ± 0.40  | 1.83                      | ± 0.43   | 1.41                      | ± 0.19   | 0.6436                                          | 0.0298 | 0.0189 |
| Dihydroouracil                            | 368.33                | ± 16.17 | 765.23                    | ± 338.80 | 417.73                    | ± 194.78 | 0.0766                                          | 0.9577 | 0.0121 |
| Imidazole-4-acetate                       | 1.70                  | ± 0.17  | 3.89                      | ± 1.80   | 2.39                      | ± 0.44   | 0.0382                                          | 0.6986 | 0.0254 |
| GABA                                      | 1.07                  | ± 0.14  | 0.81                      | ± 0.13   | 0.71                      | ± 0.21   | 0.0515                                          | 0.0081 | 0.3724 |
| Creatinine                                | 25.00                 | ± 1.73  | 74.31                     | ± 20.74  | 73.09                     | ± 30.70  | 0.0124                                          | 0.0167 | 0.992  |
| Glu                                       | 74.33                 | ± 7.64  | 108.31                    | ± 20.86  | 84.45                     | ± 24.09  | 0.0539                                          | 0.7535 | 0.0322 |
| Asn                                       | 41.33                 | ± 6.43  | 51.31                     | ± 8.13   | 43.00                     | ± 5.88   | 0.0947                                          | 0.9317 | 0.0236 |
| Thr                                       | 196.00                | ± 47.15 | 262.15                    | ± 45.14  | 222.36                    | ± 30.38  |                                                 |        |        |
| Spermidine                                | 0.10                  | ± 0.00  | 0.28                      | ± 0.15   | 0.16                      | ± 0.07   |                                                 |        |        |
| 5-Methyl-2'-deoxycytidine                 | 0.87                  | ± 0.14  | 1.23                      | ± 0.23   | 1.14                      | ± 0.13   |                                                 |        |        |
| 3-Methylhistidine                         | 19.33                 | ± 3.21  | 42.69                     | ± 6.34   | 45.27                     | ± 19.81  |                                                 |        |        |
| 1-Methyladenosine                         | 0.27                  | ± 0.10  | 0.16                      | ± 0.07   | 0.15                      | ± 0.05   |                                                 |        |        |
| alpha-Aminoadipate                        | 1.43                  | ± 0.15  | 2.37                      | ± 0.56   | 2.26                      | ± 0.49   |                                                 |        |        |
| Pipecolate                                | 3.23                  | ± 1.10  | 11.92                     | ± 2.94   | 13.54                     | ± 8.00   |                                                 |        |        |
| Pro                                       | 187.00                | ± 38.57 | 236.15                    | ± 37.96  | 241.91                    | ± 21.09  |                                                 |        |        |
| 4-(beta-Acetylaminoethyl)imidazole        | 0.22                  | ± 0.12  | 0.18                      | ± 0.09   | 0.12                      | ± 0.05   |                                                 |        |        |
| N-Acetylglucosamine                       | 4.77                  | ± 0.15  | 6.72                      | ± 1.13   | 6.08                      | ± 1.52   |                                                 |        |        |
| Glucosamine                               | 0.61                  | ± 0.04  | 0.59                      | ± 0.18   | 0.41                      | ± 0.24   |                                                 |        |        |
| Taurine                                   | 145.00                | ± 57.58 | 276.69                    | ± 88.64  | 248.82                    | ± 87.64  |                                                 |        |        |
| Lys                                       | 343.00                | ± 38.31 | 466.92                    | ± 101.17 | 457.64                    | ± 64.52  |                                                 |        |        |
| Tyramine                                  | 0.20                  | ± 0.08  | 0.43                      | ± 0.18   | 0.44                      | ± 0.17   |                                                 |        |        |
| Asp                                       | 7.50                  | ± 1.00  | 14.35                     | ± 4.92   | 12.01                     | ± 5.34   |                                                 |        |        |
| Triethanolamine                           | 1.97                  | ± 0.29  | 3.88                      | ± 1.30   | 3.92                      | ± 1.75   |                                                 |        |        |
| Gly-Leu                                   | 0.40                  | ± 0.00  | 0.73                      | ± 0.31   | 0.59                      | ± 0.23   |                                                 |        |        |
| Putrescine(1,4-Butanediamine)             | 0.68                  | ± 0.07  | 0.58                      | ± 0.21   | 0.48                      | ± 0.11   |                                                 |        |        |
| Glutathione(ox); Glutathione(ox) divalent | 0.55                  | ± 0.00  | 1.34                      | ± 0.88   | 0.91                      | ± 0.59   |                                                 |        |        |
| 5-Hydroxylysine                           | 1.47                  | ± 0.15  | 1.65                      | ± 0.62   | 2.04                      | ± 0.55   |                                                 |        |        |
| Cystathionine                             | 1.20                  | ± 0.00  | 1.86                      | ± 0.55   | 1.72                      | ± 0.58   |                                                 |        |        |
| Sarcosine                                 | 6.17                  | ± 0.90  | 7.95                      | ± 1.87   | 8.07                      | ± 1.26   |                                                 |        |        |
| o-Acetylcarnitine                         | 8.13                  | ± 1.35  | 8.74                      | ± 2.59   | 7.03                      | ± 1.91   |                                                 |        |        |
| Cytidine                                  | 3.13                  | ± 0.68  | 3.88                      | ± 1.03   | 3.29                      | ± 0.80   |                                                 |        |        |
| Betonicine                                | 0.37                  | ± 0.09  | 0.56                      | ± 0.18   | 0.49                      | ± 0.16   |                                                 |        |        |
| Phe                                       | 58.67                 | ± 4.04  | 63.77                     | ± 10.69  | 68.00                     | ± 6.74   |                                                 |        |        |
| Guanidoacetate                            | 5.47                  | ± 0.95  | 5.68                      | ± 1.33   | 4.88                      | ± 0.85   |                                                 |        |        |
| beta-Ala                                  | 3.27                  | ± 0.31  | 2.91                      | ± 0.45   | 2.75                      | ± 0.49   |                                                 |        |        |
| 7-Methylguanine                           | 0.17                  | ± 0.00  | 0.28                      | ± 0.11   | 0.26                      | ± 0.10   |                                                 |        |        |
| Hypotaurine                               | 3.80                  | ± 0.72  | 3.75                      | ± 0.88   | 3.28                      | ± 0.49   |                                                 |        |        |
| N-epsilon-Acetyllysine                    | 0.79                  | ± 0.13  | 1.02                      | ± 0.31   | 1.04                      | ± 0.13   |                                                 |        |        |
| Ectoine                                   | 1.50                  | ± 0.40  | 4.55                      | ± 3.77   | 4.09                      | ± 1.49   |                                                 |        |        |
| Azetidine-2-carboxylate                   | 0.61                  | ± 0.00  | 0.85                      | ± 0.25   | 0.86                      | ± 0.26   |                                                 |        |        |
| Kynurenine                                | 1.30                  | ± 0.20  | 1.64                      | ± 0.35   | 1.66                      | ± 0.39   |                                                 |        |        |
| Arg                                       | 137.00                | ± 23.64 | 275.85                    | ± 164.02 | 255.09                    | ± 119.46 |                                                 |        |        |
| Ser                                       | 163.00                | ± 30.32 | 183.23                    | ± 32.17  | 164.82                    | ± 34.44  |                                                 |        |        |
| Guanidinosuccinate                        | 0.39                  | ± 0.23  | 0.54                      | ± 0.23   | 0.71                      | ± 0.56   |                                                 |        |        |
| Ornithine                                 | 52.00                 | ± 21.93 | 75.54                     | ± 17.28  | 71.55                     | ± 36.26  |                                                 |        |        |
| Anserine                                  | 1.62                  | ± 0.96  | 1.08                      | ± 0.78   | 1.77                      | ± 1.81   |                                                 |        |        |
| 2'-Deoxycytidine                          | 23.33                 | ± 4.04  | 20.69                     | ± 3.66   | 20.55                     | ± 3.01   |                                                 |        |        |
| Carnitine                                 | 64.33                 | ± 8.39  | 56.00                     | ± 12.48  | 59.73                     | ± 10.18  |                                                 |        |        |
| Betaine                                   | 144.00                | ± 44.54 | 124.46                    | ± 23.10  | 134.82                    | ± 29.16  |                                                 |        |        |
| Met                                       | 48.33                 | ± 5.51  | 59.85                     | ± 21.20  | 63.27                     | ± 16.86  |                                                 |        |        |
| Val                                       | 167.67                | ± 23.44 | 153.69                    | ± 22.79  | 163.64                    | ± 27.19  |                                                 |        |        |
| Leu                                       | 136.00                | ± 20.88 | 133.00                    | ± 33.29  | 147.18                    | ± 29.31  |                                                 |        |        |
| Carnosine; Carnosine divalent             | 0.36                  | ± 0.06  | 0.37                      | ± 0.17   | 0.44                      | ± 0.22   |                                                 |        |        |
| Methionine sulfoxide                      | 7.23                  | ± 1.42  | 8.03                      | ± 1.87   | 7.51                      | ± 0.81   |                                                 |        |        |
| Uridine                                   | 16.00                 | ± 0.00  | 22.46                     | ± 11.00  | 23.36                     | ± 12.32  |                                                 |        |        |
| His                                       | 64.33                 | ± 5.51  | 69.92                     | ± 10.28  | 68.36                     | ± 8.04   |                                                 |        |        |
| Urocanate                                 | 0.99                  | ± 0.53  | 2.11                      | ± 2.00   | 4.96                      | ± 12.01  |                                                 |        |        |
| 2AB; 2-Aminobutyrate                      | 4.97                  | ± 0.61  | 4.90                      | ± 1.02   | 4.59                      | ± 0.75   |                                                 |        |        |
| Thiamine                                  | 8.23                  | ± 1.53  | 9.77                      | ± 4.36   | 8.63                      | ± 2.92   |                                                 |        |        |
| Cysteine-glutathione disulphide           | 0.89                  | ± 0.28  | 1.40                      | ± 1.12   | 1.22                      | ± 0.92   |                                                 |        |        |
| 5-Oxoproline                              | 27.00                 | ± 1.73  | 33.85                     | ± 8.21   | 31.55                     | ± 19.79  |                                                 |        |        |
| Tyr                                       | 40.67                 | ± 4.04  | 46.15                     | ± 13.92  | 45.09                     | ± 9.21   |                                                 |        |        |
| Histamine                                 | 0.28                  | ± 0.10  | 0.35                      | ± 0.30   | 0.30                      | ± 0.10   |                                                 |        |        |
| Ile                                       | 68.33                 | ± 9.50  | 67.54                     | ± 11.84  | 69.45                     | ± 13.44  |                                                 |        |        |
